# Supplementary material
Source: HighWire-hosted journal article supplement (http://heart.bmjjournals.com/highwire/filestream/125306/field_highwire_adjunct_files/0/Online_Appendix.pdf)
Supplement: Online_Appendix.pdf [file Online_Appendix.pdf]

## Appendix Hospitals participating in the trial

| hospital                                       | consultant<br>(liaison) | rehabilitation<br>co-ordinator      | research<br>interviewer    |
|------------------------------------------------|-------------------------|-------------------------------------|----------------------------|
| Birch Hill<br>(Rochdale)                       | Dr M Hargreaves         | Alan Ridley/<br>Beverley Stansfield | Jacqueline Sparks          |
| Cheltenham General<br>(Cheltenham)             | Dr VF Challenor         | Pamela Stevenson                    | Jean Pearse                |
| Glan Clwyd<br>(Rhyl)                           | Dr J Green              | Angela Howarth                      | Jacqui Jones               |
| Grantham and District<br>(Grantham) †          | Dr<br>Wijayawardhana    | -----                               | Margaret Judson            |
| Leicester Royal Infirmary<br>(Leicester)       | Prof DB Barnett         | April Gladwin                       | Ruth Upton/<br>Julie Black |
| Mayday<br>(Croydon) ††                         | Dr R Canepa-<br>Anson   | Sarah Hicks/<br>Caroline Steer      | Jennifer Staves            |
| North Devon District<br>(Barnstaple)           | Dr TL Roberts           | Anthony Andrews/<br>Jenny Arnold    | Sonia McLellan             |
| Northwick Park<br>(Harrow)                     | Dr H Bethell            | Chandra Malde                       | Carole Wood                |
| Nottingham City<br>(Nottingham)                | Dr DC Banks             | Jane Rhodes/<br>Helen Marsh         | Judith Raven               |
| Oldchurch<br>(Romford)                         | Dr RW Fowler            | Teresa Francis                      | Ann Le-May                 |
| Peterborough and District<br>(Peterborough) †† | Dr D Rowlands           | Diane Card/<br>Sue Hennessey        | Margaret Judson            |
| Pilgrim<br>(Boston)                            | Dr CR Nyman             | Charlotte Moss                      | Helen Jobling              |
| Queen Elizabeth<br>(Birmingham)                | Prof W Littler          | Kate Gee                            | Judith Campbell            |
| Queen Elizabeth the Queen<br>Mother (Margate)  | Dr S Mukherjee          | Brian Kellerher/<br>Shelley Sage    | Jackie Dolan               |
| Singleton<br>(Swansea)                         | Dr C Weston             | Alison Darlington/<br>Julie Thomas  | Sylvia Coates              |
| Stafford District General<br>(Stafford)        | Dr J Francis            | Chris MacKenzie                     | Sheila Palmer              |
| Whipps Cross<br>(London) †                     | Dr JC Hogan             | -----                               | Karen Ferrari              |
| Withybush General<br>(Haverfordwest)           | Dr N Jowett             | Irene Hartup                        | Nina Graham                |

† elective control

†† elective rehabilitation
